# Supplementary material for: Genetic interaction networks mediate individual statin drug response in Saccharomyces cerevisiae
Source: PubMed Central journal article supplement (PMC6776536; doi:10.1038/s41540-019-0112-5), 2019-10-03
Supplement: 41540_2019_112_MOESM13_ESM.pdf [file 41540_2019_112_MOESM13_ESM.pdf]

**Supplementary Table S1.** Yeast strains used in this study.

**Supplementary Table S2.** Pairwise alignment of ssDMA libraries to the corresponding SGRP and S288C parental strains.

**Supplementary Table S3.** Linkage groups in SGA analyses.

**Supplementary Table S4.** Genetic interaction scores for the 20 primary GINs.

**Supplementary Table S5.** Adjacency matrix files of  $\sim 2000 \times \sim 2000$  nodes for 20 augmented GINs.

**Supplementary Table S6.** Data used for the SAFE analysis.

**Supplementary Table S7.** Community analysis GO terms by coverage and score.

**Supplementary Table S8.** Community analysis genes.

**Supplementary Table S9.** Cluster Silhouette and Calinski-Harabasz Index scores.

**Supplementary Table S10.** Uniqueness scores.

**Supplementary Table S11.** Primers used in this study.

**Supplementary Table S12.** Plasmids used in this study.
